1 Title

2 Correlates of COVID-19 vaccination status among college students

3 Michele Nicolo<sup>1</sup>, Eric Kawaguchi<sup>1</sup>, Angie Ghanem-Uzqueda<sup>1,2</sup>, Andre E. Kim<sup>1</sup>, Daniel Soto<sup>1</sup>,

4 Sohini Deva<sup>1</sup>, Kush Shanker<sup>1</sup>, Christopher Rogers<sup>1</sup>, Ryan Lee<sup>1</sup>, Frank Gilliland<sup>1</sup>, Jeffery

5 Klausner<sup>1</sup>, Andrea Kovacs<sup>3</sup>, David Conti<sup>1</sup>, Howard Hu<sup>1</sup>, Jennifer B. Unger, Ph.D<sup>1</sup>.

6 1. Department of Population and Public Health Sciences, Keck School of Medicine, University

7 of Southern California, Los Angeles California

8 2. Family Medicine, Keck Medicine of USC, Los Angeles, California

9 3. Keck School Medicine of USC, University of Southern California, Los Angeles California

10 Abstract:

11 Objectives. Despite the widespread availability of COVID-19 vaccines in the United States,

12 vaccine hesitancy remains high among certain groups. This study examined the correlates of

13 being unvaccinated among a sample of university students (N=2900) during the spring and

14 summer of 2021, when the campus had been closed for over a year and students were preparing

15 to return to in-person learning.

16 Methods. Students responded to an email invitation and completed electronic surveys.

17 Results. In multivariable logistic regression analyses, students were more likely to be

18 unvaccinated if they were African American, identified with any political affiliation other than

19 Democrat, were undergraduates or international students, had not traveled outside the Los

20 Angeles during the pandemic, and/or had previously been ill with COVID-19.

21 Conclusion. Findings indicate that culturally resonant educational interventions, and possibly

22 vaccine requirements, are needed to promote vaccination among university students.

23

24

## 25 Introduction

26           The recent slowing of COVID-19 vaccination among adults suggests vaccine hesitancy in  
27 some individuals and groups.[1] Reasons for vaccine hesitancy include disparities in access to  
28 vaccines and accurate information, political influences, concern over adverse health effects  
29 including infertility, and mistrust of the medical community [2-5].

30           Given the rising trend in COVID-19 cases, the increased risk posed by the reopening of  
31 college campuses, low vaccine uptake among young adults, the dynamic nature of this pandemic,  
32 and the fact that young adult vaccination is a critical component needed to reduce morbidity and  
33 mortality, research on vaccine hesitancy among college students is needed. Successful health  
34 communication campaigns to encourage vaccination among this group will depend on a thorough  
35 understanding of the epidemiology of vaccine hesitancy. To investigate college student vaccine  
36 hesitancy, this study examined characteristics associated with being unvaccinated among  
37 university students during the spring and summer of 2021.

## 38 Methods

### 39 Participants

40           Participants were students at the University of Southern California (USC) in Los  
41 Angeles, California. Students were eligible if they were currently enrolled at USC, were at least  
42 18 years of age, and provided informed consent.

### 43 Procedure

44           The USC Institutional Review Board approved the study. The study was advertised on  
45 university websites. Emails were sent to all undergraduate and graduate students inviting them to  
46 participate in a brief COVID-19 survey. Interested students clicked on a link in the email,  
47 provided informed consent electronically, and completed the online survey. Survey responses

48 were collected from 4/29/2021 to 07/12/2021, with 86.3% of the surveys completed in April and  
49 May 2021. After removing duplicate and incomplete surveys, the sample size was 2900.

#### 50 Measures

51 Demographic variables included self-identified race and ethnicity (White; Asian/Asian  
52 American; Black/African American; Hispanic/Latinx; multicultural; or other), sex, degree status  
53 (undergraduate versus graduate student), international student status (yes/no), and political  
54 affiliation (Democrat, Independent, Republican, something else). COVID-19 history was self-  
55 reported and categorized as “yes” or “no”. Additional questions asked about housing, degree  
56 program, recent travel outside of Los Angeles, COVID-19 knowledge, and attitudes and  
57 compliance with prevention behaviors including masking. The outcome variable was self-  
58 reported vaccination status at the time of the survey.

#### 59 Data analysis

60 Univariate logistic regression models were run to select variables for inclusion in the  
61 final models. Variables that were significantly associated with vaccination status at  $p < 0.05$  were  
62 included in a final multivariable model. Adjusted odds ratios and 95% confidence interval  
63 associated with vaccination status are reported.

#### 64 Results

65 Among the 28,412 students who were sent invitation emails, 2,900 students completed  
66 the survey and were included in the analysis. Table 1 shows the demographic characteristics of  
67 the sample. The demographic characteristics of the sample were similar to those of the USC  
68 student population, although the sample was overrepresented by Asians and women and  
69 underrepresented by Latinx/Hispanic and international students. Most participants (82.9%) self-  
70 reported that they were vaccinated at the time of the survey.

71 Table 1 shows the odds ratios and 95% confidence intervals from the multivariable  
72 analysis of characteristics associated with the likelihood of being unvaccinated. African  
73 Americans had higher odds of being unvaccinated compared to Non-Hispanic White participants  
74 (OR=1.88, 95% CI: 1.20, 2.96). Undergraduate students (OR= 1.39, 95% CI: 1.13, 1.72) and  
75 international students (OR=2.80, 95% CI: 1.97, 3.98) had higher odds of being unvaccinated  
76 when compared to graduate students and domestic students, respectively. Participants reporting  
77 previous COVID-19 illness (OR= 1.98, 95% CI: 1.56, 2.50) had higher odds of being  
78 unvaccinated compared to students reporting no history of having COVID-19. Identifying  
79 political affiliation as Independent (OR=2.31, 95% CI:1.81, 2.95), Republican (OR=1.56, 95%  
80 CI: 1.03, 2.35) or something else (OR= 2.31, 95% CI: 1.63, 3.27) were associated with greater  
81 odds of being unvaccinated compared to Democrats. Students who had traveled out of the Los  
82 Angeles area during the pandemic were more likely to be vaccinated (OR=0.77, 95% CI: 0.62,  
83 0.96) compared to students who remained in Los Angeles. No other variables were associated  
84 with being unvaccinated.

## 85 Discussion

86 This study identified correlates of being unvaccinated for COVID-19 among a large  
87 sample of university students during the spring and summer of 2021, when the university had  
88 been operating completely online for over a year and before implementation of a vaccination  
89 policy for campus reopening. At the time of survey completion, a large percentage of student  
90 participants (82.9%) reported that they had already received the COVID-19 vaccine. This  
91 increased to 94.2% after a vaccine mandate was announced later in the summer.

92 The significant risk factors for being unvaccinated included African American race, all  
93 political affiliations except Democrat, previous history of COVID-19 infection, staying in the

94 Los Angeles area during the pandemic, and being an undergraduate or international student.  
95 Consistent with previous studies [23-32], African Americans were especially likely to be  
96 unvaccinated. Low vaccination uptake among African Americans has been attributed a history  
97 of racial discrimination and injustice resulting in distrust of the medical community, and  
98 disparities in vaccine access. Culturally relevant health communications from trusted  
99 spokespeople in the African American community could potentially increase vaccination among  
100 this group.[6]

101 Students who identified as Democrats were more likely to be vaccinated than those with  
102 other political affiliations. The COVID-19 vaccine was developed and received emergency  
103 authorization in the U.S. during a time of political tension.[5, 7-9] Other studies of college  
104 students and other adults have found that conservative political ideology is associated with  
105 vaccine hesitancy and distrust.[10] Interventions are needed to counter distrust of science and  
106 government.

107 Previous history of COVID-19 infection was associated with being unvaccinated.  
108 Students who had had COVID-19 might have believed that they already had immunity and did  
109 not need the vaccine. However, recent studies have shown that vaccination prevents reinfection  
110 and severe disease among people who have recovered from COVID-19. [11]

111 Previous studies have documented vaccine hesitancy and skepticism among university  
112 students, including low perceived risk of serious illness, mistrust of the vaccine development  
113 process, perception that the vaccine was developed too quickly, doubts about the safety of the  
114 vaccine, and lack of information [32,33]. However, previous studies were limited by small  
115 samples of students enrolled in specific degree programs. This study extends the findings of  
116 previous studies by employing a large, diverse sample consisting of undergraduate and graduate

117 students across academic disciplines, during a pivotal time period when they were making  
118 decisions about whether to get vaccinated to prepare for the return to in-person learning in the  
119 fall of 2021.

## 120 Limitations

121 This analysis was based on a non-random sample of university students who responded  
122 to an online survey. Findings may not generalize to the larger student population or to other  
123 universities. Future studies are needed to identify correlates of vaccination and vaccine hesitancy  
124 among students who chose not to participate. Vaccination status was self-reported.

## 125 Conclusions

126 This study identifies subgroups of university students who were vaccine-hesitant prior to  
127 the start of the 2021-2022 academic year. Although some of these students subsequently got  
128 vaccinated after a vaccine policy was implemented, this study identifies groups that potentially  
129 need more education and outreach to promote vaccination. Understanding factors contributing to  
130 vaccine hesitancy provide the necessary knowledge of how to target education campaigns across  
131 college and university campuses, presenting an opportunity to collaborate with students and  
132 leadership to build reliable, evidence-based resources to face future pandemics.

133

134

135

136  
137  
138  
139  
140  
141  
142  
143  
144  
145  
146  
147  
148  
149  
150  
151  
152  
153  
154  
155  
156  
157  
158  
159  
160  
161  
162  
163  
164  
165  
166  
167  
168  
169  
170  
171

## References

1. Adams, S.H., et al., *Young Adult Perspectives on COVID-19 Vaccinations*. Journal of Adolescent Health, 2021.
2. Thompson, H.S., et al., *Factors Associated With Racial/Ethnic Group–Based Medical Mistrust and Perspectives on COVID-19 Vaccine Trial Participation and Vaccine Uptake in the US*. JAMA Network Open, 2021. **4**(5): p. e2111629-e2111629.
3. Willis, D.E., et al., *COVID-19 vaccine hesitancy: Race/ethnicity, trust, and fear*. Clinical and Translational Science, 2021.
4. Momplaisir, F., et al., *Understanding drivers of COVID-19 vaccine hesitancy among Blacks*. Clinical infectious diseases: an official publication of the Infectious Diseases Society of America, 2021.
5. Tram, K.H., et al., *Deliberation, Dissent, and Distrust: Understanding distinct drivers of COVID-19 vaccine hesitancy in the United States*. Clinical Infectious Diseases, 2021.
6. Moore, J.X., et al., *Correlates of COVID-19 Vaccine Hesitancy among a Community Sample of African Americans Living in the Southern United States*. Vaccines, 2021. **9**(8): p. 879.
7. Wood, S. and K. Schulman, *Beyond politics—promoting Covid-19 vaccination in the United States*. 2021, Mass Medical Soc.
8. Greer, S.L., et al., *The comparative politics of COVID-19: The need to understand government responses*. Global public health, 2020. **15**(9): p. 1413-1416.
9. Lalot, F., et al., *The dangers of distrustful complacency: Low concern and low political trust combine to undermine compliance with governmental restrictions in the emerging Covid-19 pandemic*. Group Processes & Intergroup Relations, 2020: p. 1368430220967986.
10. Williams, C.Y. and A.F. Ferreira, *Impact of political partisanship on public interest in infection prevention measures in the United States: An infodemiological study*. Preventive medicine reports, 2021. **23**: p. 101493.
11. Fowlkes, A., et al., *Effectiveness of COVID-19 vaccines in preventing SARS-CoV-2 infection among frontline workers before and during B. 1.617. 2 (Delta) variant predominance—Eight US locations, December 2020–August 2021*. Morbidity and Mortality Weekly Report, 2021. **70**(34): p. 1167.

172 Table 1. Characteristics associated with the likelihood of not receiving the COVID-19 vaccine among  
 173 university students using an adjusted binary logistic regression model. (N=2900)

| Characteristic                        | N %         | Odds Ratio | 95 % Confidence Interval |
|---------------------------------------|-------------|------------|--------------------------|
| <u>Race/ethnicity</u>                 |             |            |                          |
| Asian or Asian American               | 997 (34.4)  | Reference  | Reference                |
| Black or African American             | 142 (4.9)   | 1.14       | 0.86, 1.51               |
| Hispanic/Mexican/Spanish/Latinx       | 218 (7.5)   | 1.88       | 1.20, 2.96               |
| Multicultural or other                | 682 (23.5)  | 1.49       | 0.99, 2.28               |
| White                                 | 861 (29.7)  | 0.97       | 0.72, 1.30               |
| <u>Sex</u>                            |             |            |                          |
| Female                                | 1853 (63.9) | Reference  | Reference                |
| Male                                  |             | 0.95       | 0.77, 1.18               |
| <u>Student Status</u>                 |             |            |                          |
| Undergraduate                         | 1384 (47.8) | Reference  | Reference                |
| Graduate                              | 1514 (52.2) | 1.39       | 1.13, 1.72               |
| <u>International student</u>          |             |            |                          |
| Yes                                   | 188 (6.7)   | Reference  | Reference                |
| No                                    | 2629 (93.3) | 2.80       | 1.97, 3.98               |
| <u>Traveled in/out of Los Angeles</u> |             |            |                          |
| Yes                                   | 1882 (65.8) | Reference  | Reference                |
| No                                    | 978 (34.2)  | 0.77       | 0.62, 0.96               |
| <u>Political Affiliation</u>          |             |            |                          |
| Democrat                              | 1876 (64.7) | Reference  | Reference                |
| Independent                           | 563 (19.4)  | 2.31       | 1.81, 2.95               |
| Republican                            | 178 (6.1)   | 1.56       | 1.03, 2.35               |
| Something else                        | 283 (9.8)   | 2.31       | 1.63, 3.27               |
| <u>Had COVID-19</u>                   |             |            |                          |
| Yes                                   | 622 (21.4)  | Reference  | Reference                |
| No                                    | 2278 (78.6) | 1.98       | 1.56, 2.50               |

174
